# Supplementary material
Source: PubMed Central journal article supplement (PMC3148172)

## The ANRS HIV controllers cohort group:

Mme Patricia Eglinger, Dr Jean-Pierre Faller, Service des Maladies Infectieuses, Centre Hospitalier de Belfort, Belfort. Mme Martine Malet, Dr Hugues Aumaître, Service des Maladies Infectieuses et Tropicales, Hôpital Saint Jean, Perpignan. Melle Kmiec Isabelle, Dr Christine Rouger, Service des Maladies Infectieuses, CHU Reims Hopital Robert Debre, Reims. Mme Patricia Honoré, Dr Michelle Bentata, Service de Médecine Interne, Hôpital Avicenne, Bobigny. Mme Juliette Gerbe, Dr Philippe Genet, Service Hématologie/Immunologie, Hôpital Victor Dupouy, Argenteuil. Mr Richier Laurent, Dr Olivier Patey, Service des Maladies Infectieuses et Tropicales, CHI Villeneuve Saint Georges, Villeneuve Saint Georges. Dr Laurence Gerard, Pr Eric Oksenhendler, Service d'Immunopathologie, Hôpital Saint Louis, Paris. Mme Véronique Ronat, Mme Maëlle Detoc, Pr Frederic Lucht, Service des Maladies Infectieuses, Hôpital Bellevue, Saint Etienne. Mme Jeannine Delgado, Pr Daniel Séréni, Service de Médecine Interne, Hôpital Saint Louis, Paris. Dr Olivier Lambotte, Mme Katia Bourdic, Pr Jean-François Delfraissy, Service de Médecine Interne, Hôpital de Bicêtre, Le Kremlin Bicêtre. Dr Gilles Pichancourt, Dr Gilles Pichancourt, Service Hématologie, Hôpital Henri Duffaut(Avignon), Avignon. Mme Philip Gisèle, Dr Alain Lafeuillade, Service d'Infectiologie, Hôpital Font-Pré, Toulon. Melle Lerondel, Pr Christophe Rapp, Service des Maladies Infectieuses, Hôpital d'Instruction des Armées Bégin, Saint Mandé. Mme Huguette Berthé, Dr P. de Truchis, Service de Maladies Infectieuses et Tropicales, Hôpital Raymond Poincaré, Garches. Mme Sylvie Tassi, Dr Vincent Jeantils, Unité de Maladies Infectieuses, Hôpital Jean Verdier, Bondy. Mme Claudine Bolliot, Pr Daniel Vittecoq, Service des Maladies Infectieuses, Hôpital Paul Brousse, Villejuif. Dr Thomas L'Yavanc, Pr Gilles Pialoux, Service des Maladies Infectieuses, Hôpital Tenon, Paris. Dr Tuyet Huynh, Pr Olivier Bouchaud, Service des Maladies Infectieuses et Tropicales, Hôpital Avicenne, Bobigny. Dr Véronique Chambrin, Pr François Boué, Service de Médecine Interne, Hôpital Antoine Béclère, Clamart. Dr Maria Manea, Pr Laurence Weiss, Service d'Immunologie Clinique, HEGP, Paris. Mme Marie-Pierre Pietri, Pr Dominique Salmon-Céron, Service de Médecine Interne 2, Hôpital Cochin, Paris. Dr David Zucman, Pr Olivier Blétry, Service de Médecine Interne, Hôpital Foch, Suresnes. Mme Zeng Feng, Dr Mortier, Service de Médecine Interne, Hôpital Louis Mourier, Colombes. Mme Saadia Benabdallah, Pr Katlama Christine, Service des Maladies Infectieuses, Hôpital Pitié-Salpêtrière, Paris. Mme Catherine Lupin, Pr Pierre-Marie Girard, Service des Maladies Infectieuses, Hôpital Saint-Antoine, Paris. Dr Diane Ponscarne, Pr Jean Michel Molina, Service des Maladies Infectieuses et Tropicales, Hôpital Saint-Louis, Paris. Mme Véronique Beaujolais, Dr André Cabiè, Service des Maladies Infectieuses et Tropicales, Hôpital Pierre Zobda Quitman, Fort de France (Martinique). Mme Sabrina Caldato, Pr Philippe Morlat, Service de Médecine Interne, Hôpital Saint Andre, Bordeaux. Dr Claire Genet, Pr Pierre Weinbreck, Unité des Maladies Infectieuses, Hôpital Dupuytren, Limoges. Dr Koffi Kouadjo, Corinne Brochier, Pr Christian Trépo, Service hépato-gastroentérologie, Hôpital Hôtel Dieu, Lyon. Mme Alena Ivanova, Dr Olivia Faucher, Dr Isabelle Poizot-Martin, Unité de Recherche Clinique, Hôpital Sainte Marguerite, Marseille. Mme Godard Cyndi, Pr Patrick Yeni, Service de maladies Infectieuses et Tropicales, Hôpital Bichat Claude Bernard, Paris. Mme Delphine Brosseau, Mr Herve Hüe, Pr François Raffi, Service de médecine Interne, Hôpital de l'hôtel Dieu, Nantes. Mme Marie Ange Serini, Pr Pierre Dellamonica, Service des maladies infectieuses, Hôpital de l'Archet, Nice. Mme Maja Ratajczak, Pr Christian Michelet, Service des Maladies Infectieuses, CHU Rennes, Rennes. Mme Patricia Fischer, Dr David Ray, Hôpital de jour-COREVIH, Hôpitaux Universitaires de Strasbourg, Strasbourg. Mme Pascale Nau, Pr Patrick Chootet, Service des Maladies Infectieuses, CHU Bretonneau, Tours. Mme Florence Balsarin, Pr Patrice Massip, Service des Maladies Infectieuses, Hôpital Purpan, Toulouse. P. Féret, P. Goubin, Pr Claude Bazin, Service des Maladies Infectieuses, Hôpital de la Côte de Nacre, Caen. Mme Gerberonide, Dr Pascale Leclercq, Service Médecine Aigüe, Hôpital Albert Michallon, Grenoble. Dr Aissi Emmanuelle, Dr Huleux Thomas, Pr Yazdan Yazdanpanah, Service des Maladies Infectieuses, Centre Hospitalier de Tourcoing, Tourcoing. Mme S. Wassoubou, Pr Thierry May, Service de maladies Infectieuses et Tropicales, CHU Nancy, Nancy. Dr Yasmine Debab, Pr François Caron, Service de maladies Infectieuses et Tropicales, Hôpital Charles Nicolle, Rouen. M Laurent Richier, Dr Isabelle de Lacroix-Szmania, Service des Médecine Interne, Centre Hospitalier Intercommunal, Créteil. Dr Daniel Garipuy, Dr Marc Uzan, Service de Médecine Interne, Hôpital Joseph Ducaing, Toulouse. Mme Martine Deschaud, Dr Laurent Blum, Service de dermatologie-2ème étage, Centre hospitalier René Dubos, Pontoise. Dr Christophe Michau, Dr Christophe Michau, Service de Médecine Interne, Centre Hospitalier de Saint Nazaire, Saint Nazaire. Mme Martine Deschaud, Dr Annie Lepretre, Unité Escalé, Hôpital Simone Veil, Eaubonne. Mme Christine Chapus, Dr Patrick Philibert, Consultation de Médecine Interne, Hôpital Ambroise Paré, Marseille. Dr Agnès Cros, Dr Jack Gilquin, Centre de diagnostic et de thérapeutique, Hôpital Hotel Dieu, Paris.

**Table S1. Characteristics of HIV controllers included in the study**

| Patient | Sex <sup>1</sup> | HIV-1 diagnosed | Last CD4+ T cell count (cells/ml) | Last RNA viral load (copies/ml) | Median Viral load (copies/ml) <sup>2</sup> |
|---------|------------------|-----------------|-----------------------------------|---------------------------------|--------------------------------------------|
| 1001    | F                | 1993            | 920                               | <40                             | 51                                         |
| 3001    | M                | 1990            | 1665                              | 157                             | und                                        |
| 3002    | M                | 2005            | 540                               | 53                              | 53                                         |
| 5002    | M                | 1994            | 1314                              | <40                             | und                                        |
| 18003   | F                | 2003            | 513                               | 332                             | 170                                        |
| 18004   | M                | 1985            | 690                               | <40                             | und                                        |
| 19003   | M                | 1996            | 655                               | 86                              | und                                        |
| 23001   | F                | 1996            | 803                               | 42                              | 70                                         |
| 23002   | F                | 1987            | 494                               | <40                             | und                                        |
| 23005   | M                | 2001            | 595                               | 328                             | NA <sup>3</sup>                            |
| 24001   | M                | 1989            | 716                               | 45                              | 50                                         |
| 34003   | F                | 1992            | 857                               | <40                             | und                                        |
| 34012   | M                | 1985            | 417                               | 208                             | und                                        |
| 34014   | F                | 1996            | 572                               | 79                              | 52                                         |
| 34016   | M                | 2002            | 681                               | <40                             | NA                                         |
| 43001   | M                | 1998            | 774                               | <40                             | und                                        |
| 44001   | M                | 1985            | 1180                              | 29                              | und                                        |
| 47001   | M                | 1992            | 790                               | 52                              | und                                        |
| 47003   | F                | 2004            | 620                               | <40                             | und                                        |
| 54001   | F                | 1995            | 892                               | 36                              | und                                        |
| 56002   | F                | 1993            | 438                               | 80                              | und                                        |
| 56004   | F                | 1990            | 678                               | 130                             | und                                        |
| 56007   | M                | 2004            | 908                               | <40                             | und                                        |
| 56009   | M                | 1990            | 551                               | <40                             | und                                        |
| 56010   | F                | 2002            | 472                               | <40                             | und                                        |
| 57002   | M                | 1989            | 1150                              | <40                             | und                                        |
| 57005   | F                | 2001            | 950                               | <40                             | 25                                         |
| 58003   | F                | 1997            | 649                               | <40                             | und                                        |
| 60005   | M                | 1995            | 931                               | <40                             | 30                                         |
| 60006   | F                | 1985            | 467                               | 38                              | und                                        |
| 62001   | M                | 2004            | 519                               | 340                             | und                                        |
| 62008   | M                | 1991            | 957                               | 110                             | 158                                        |
| 62009   | M                | 1993            | 622                               | <40                             | und                                        |
| 62011   | M                | 1986            | 440                               | 66                              | und                                        |
| 62012   | M                | 2005            | 1182                              | 54                              | und                                        |
| 67004   | M                | 1992            | 636                               | 28                              | 50                                         |
| 71001   | F                | 1996            | 407                               | <40                             | und                                        |
| 73002   | M                | 2004            | 527                               | 224                             | 93                                         |
| 73005   | F                | 1999            | 461                               | <40                             | und                                        |
| 73006   | F                | 2002            | 814                               | <40                             | und                                        |
| 73007   | F                | 1989            | 600                               | 22                              | und                                        |
| 76001   | M                | 1990            | 449                               | 257                             | und                                        |
| 76002   | F                | 1986            | 1409                              | <40                             | und                                        |
| 85001   | M                | 1987            | 1328                              | <40                             | und                                        |
| 86005   | F                | 1996            | 775                               | <40                             | und                                        |
| 89001   | F                | 1995            | 1400                              | 148                             | 32                                         |
| 92001   | M                | 1989            | 1147                              | 117                             | 45                                         |
| 93001   | F                | 1996            | 1571                              | <40                             | und                                        |
| 114002  | M                | 1992            | 690                               | <40                             | und                                        |
| 114003  | M                | 1993            | 467                               | <40                             | und                                        |
| 134001  | M                | 1990            | 1164                              | <40                             | und                                        |
| 171001  | M                | 1986            | 437                               | <40                             | und                                        |
| 196001  | M                | 1992            | 648                               | 366                             | und                                        |
| 196003  | F                | 1985            | 1632                              | <40                             | und                                        |
| 200001  | F                | 1993            | 266                               | <40                             | und                                        |

<sup>1</sup>F: Female; M: Male; <sup>2</sup>Since infection; und: below the level of detection; <sup>3</sup>Non available

**Figure S1. Reduced susceptibility of CD4+ T cells from HIC to X4 HIV-1 and SIVmac251 infection.** Viral replication in antiCD3-activated CD4+ T cells from HIC and HD, after challenge with HIV-1 NL4.3 (A) or SIVmac251 (B), using a suboptimal infection in vitro protocol. Symbols represent the average (n=3 independent infections) p24(HIV-1)/p27(SIVmac251) values detected on day 7 post-infection (p.i.) in culture supernatants for each donor. Horizontal lines indicate median values.

**Figure S2. P21 expression level does not correlate with the susceptibility of CD4+ T cells or macrophages to HIV-1 infection.** A. Levels of p21 mRNA in MDM from 7 HIC and 6 HD and levels of viral replication 10 days p.i. with HIV-1 BaL. Each symbol represents one individual (circles, HIC; triangles, HD). B. P21 mRNA expression in CD4+ T cells ex vivo from 14 HIC and 15 HD was compared with the level of HIV-1 BaL replication on day 7 p.i. in the same cells.

**Figure S3. Apobec3G and Trim5 $\alpha$  are not differently regulated in non-activated and activated CD4+ T cells from HIC.** Differential mRNA expression of Apobec3G and Trim5 $\alpha$  in CD4+ T cells ex vivo (black bars) and after 5 days of antiCD3 stimulation (grey bars) in 9 HIC versus 10 HD (A) and versus 9 HAART-treated individuals (B). Median relative mRNA expression in HD and ART was subtracted from HIC values. P21 values shown in Figure 4B are shown here for reference.

**Figure S1**

**A**

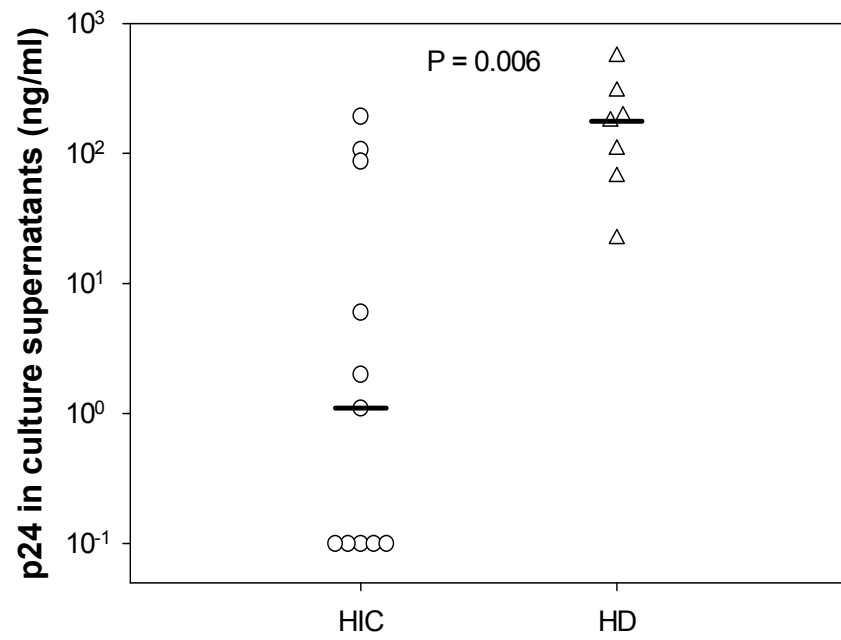

**B**

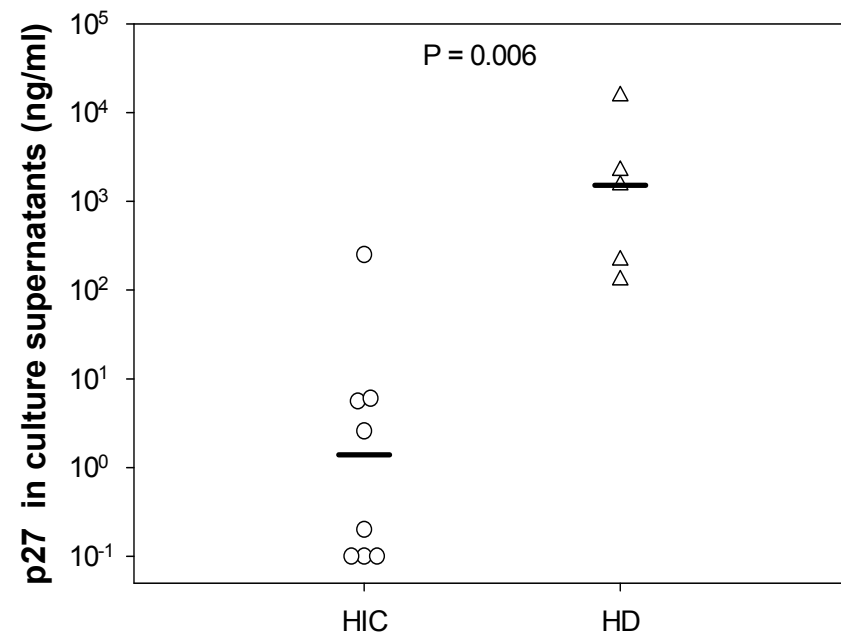

**Figure S2**

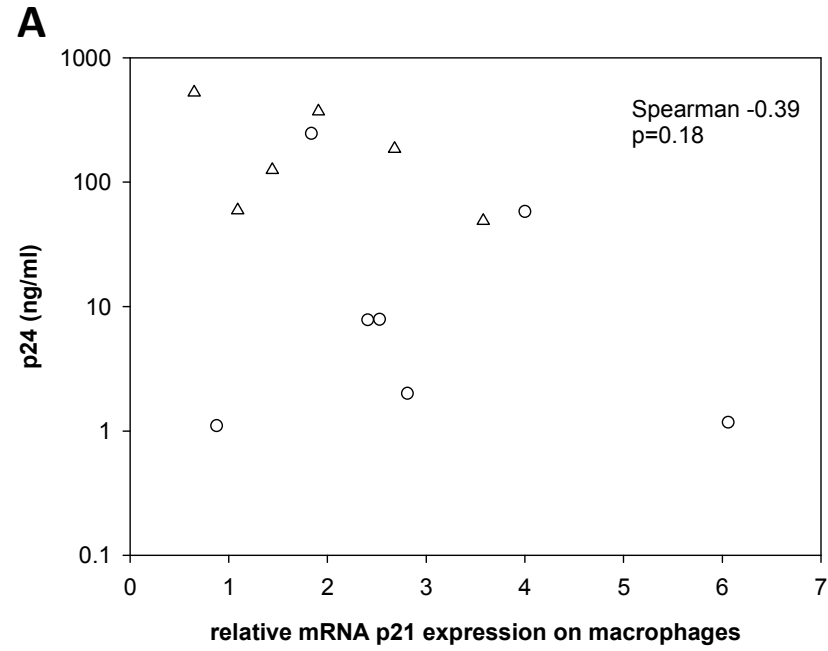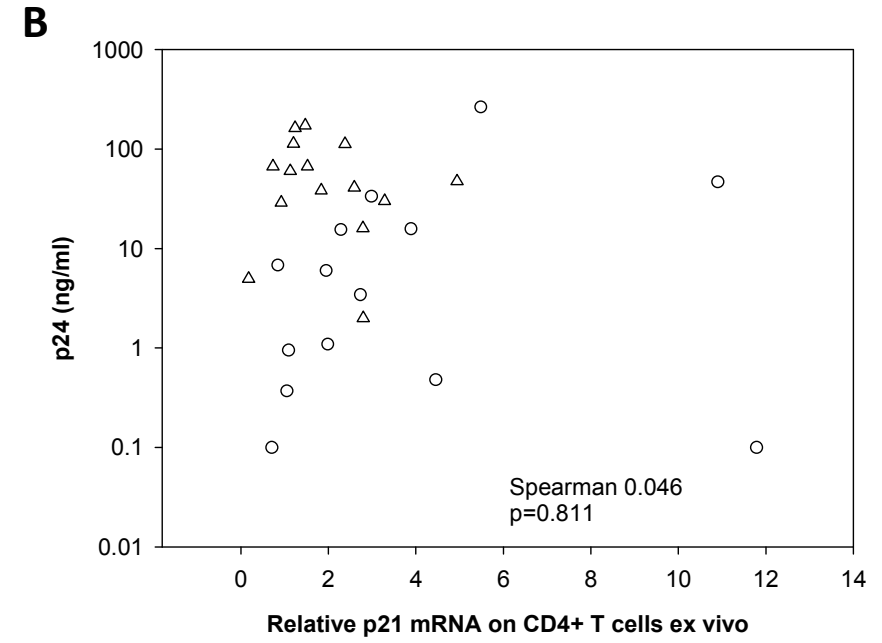

**Figure S3**

**A**

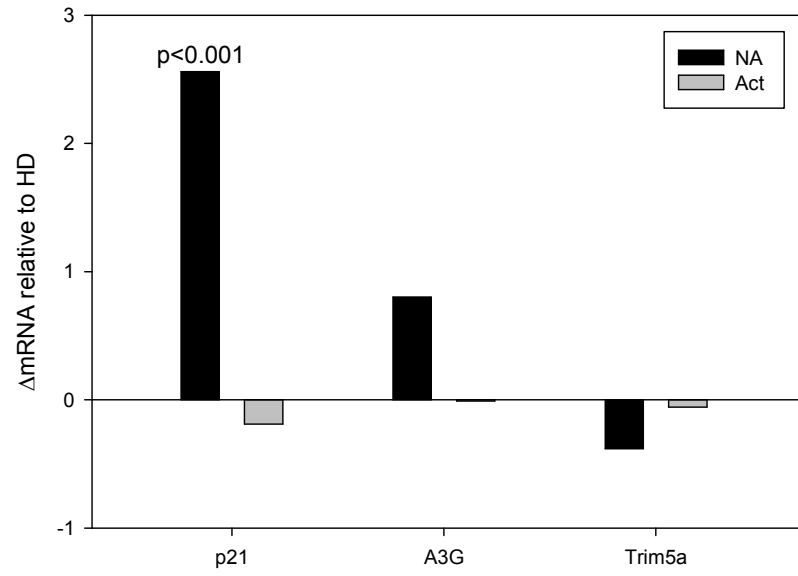

**B**

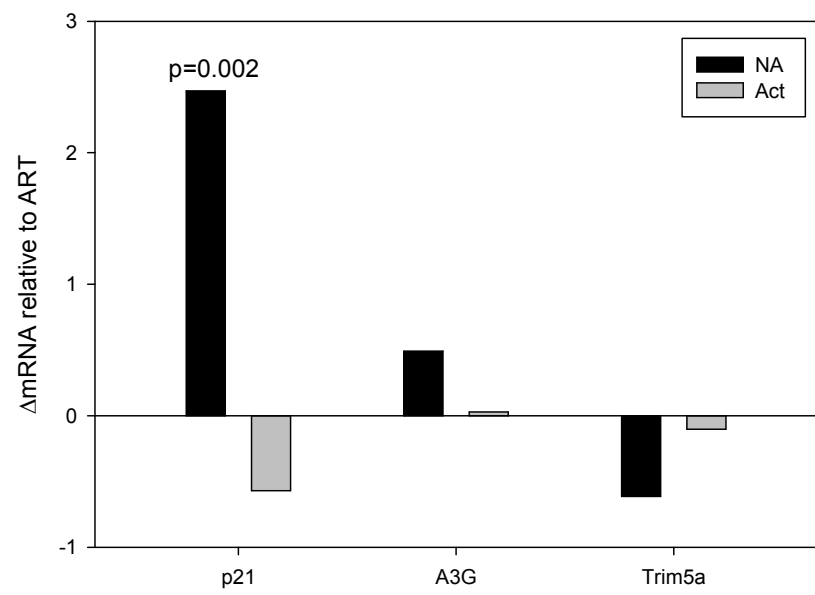

Supplement: supp_blood-2010-12-327106_Document1.pdf [file supp_blood-2010-12-327106_Document1.pdf]
